# Supplementary material for: An Experimental Investigation of the Functional Hypothesis and Evolutionary Advantage of Stone-Tipped Spears
Source: PLoS One. 2014 Aug 27;9(8):e104514. doi: 10.1371/journal.pone.0104514 (PMC4146534; doi:10.1371/journal.pone.0104514)
Supplement: File S1 — Supplementary tables, figures, and appendices. (DOCX) [file pone.0104514.s001.docx]

**Supplementary Information for: An Experimental Investigation of the Functional Hypothesis and Evolutionary Advantage of Stone-Tipped Spears**

Jayne Wilkins1*, Benjamin J. Schoville1, Kyle S. Brown2

1Institute of Human Origins, School of Human Evolution and Social Change, Arizona State University, Tempe AZ, U.S.A.

2Department of Archaeology, University of Cape Town, Cape Town, South Africa

*corresponding author ([jayne.wilkins@asu.edu](mailto:jayne.wilkins@asu.edu))

**Table S1.** Summary statistics of quartzite points used to tip experimental spears.

| **Spear Number** | **Technological Length (mm)** | **Max Width (mm)** | **Max Thickness (mm)** | **Mass (g)** | **TCSA** | **Material** |
| --- | --- | --- | --- | --- | --- | --- |
| 13-T1 | 69 | 35 | 13 | 23 | 225 | Quartzite (Fransmanshoek) |
| 13-T2 | 68 | 32 | 12 | 23 | 190 | Quartzite (Cape St. Blaize) |
| 13-T3 | 61 | 36 | 8 | 17 | 142 | Quartzite (Cape St. Blaize) |
| 13-T4 | 81 | 33 | 15 | 31 | 244 | Quartzite (Cape St. Blaize) |
| 13-T5 | 66 | 34 | 15 | 26 | 256 | Quartzite (Cape St. Blaize) |
| **Mean** | **69** | **34** | **13** | **24** | **211** |  |
| **Min** | **61** | **32** | **8** | **17** | **142** |  |
| **Max** | **81** | **36** | **15** | **31** | **256** |  |
| **SD** | **7** | **2** | **3** | **5** | **46** |  |

**Table S2.** Summary statistics for complete experimental spears.

| **Spear Number** | **Spear Type** | **Mass (g)** | **Length (cm)** |
| --- | --- | --- | --- |
| 13-U1 | Untipped | 630 | 120.7 |
| 13-U2 | Untipped | 619 | 121.3 |
| 13-U3 | Untipped | 526 | 121.4 |
| 13-U4 | Untipped | 565 | 121.6 |
| 13-U5 | Untipped | 583 | 121.0 |
| 13-T1 | Tipped | 551 | 123.8 |
| 13-T2 | Tipped | 556 | 124.1 |
| 13-T3 | Tipped | 547 | 123.2 |
| 13-T4 | Tipped | 578 | 124.1 |
| 13-T5 | Tipped | 549 | 122.6 |
| **Mean** |  | **570** | **122.4** |
| **Min** |  | **526** | **120.7** |
| **Max** |  | **630** | **124.1** |
| **SD** |  | **33** | **1.3** |

**Table S3.** Comparison of velocity (m/s) between tipped and untipped thrusting spear replicates. The radar gun failed to record velocity for a number of shots, which is why the N values are much lower than the number of shots taken.

|  | **Mean** | **95% CI** | **Min** | **Max** | **SD** | **N** |
| --- | --- | --- | --- | --- | --- | --- |
| Tipped | 9.4 | 9.0 - 9.8 | 8.3 | 10.3 | 0.71 | 13 |
| Untipped | 8.9 | 8.5 - 9.4 | 7.8 | 9.7 | 0.62 | 10 |

**Table S4.** Comparison of penetration depth (cm) between stone-tipped and untipped thrusting spear replicates into ballistics gelatin.

|  | **Mean** | **95% CI** | **Min** | **Max** | **SD** | **N** |
| --- | --- | --- | --- | --- | --- | --- |
| Tipped | 20.0 | 19.2 to 20.8 | 15.2 | 23.2 | 1.8 | 22 |
| Untipped | 22.0 | 21.1 to 22.8 | 19.3 | 25.5 | 1.9 | 22 |

**Table S5.** Comparison of the pull-out force (kg) required to extract stone-tipped and untipped thrusting spear replicates from ballistics gelatin.

|  | **Mean** | **95% CI** | **Min** | **Max** | **SD** | **N** |
| --- | --- | --- | --- | --- | --- | --- |
| Tipped | 6.5 | 5.974 to 7.054 | 4.3 | 8.5 | 1.2 | 21 |
| Untipped | 6.4 | 5.629 to 7.266 | 3.8 | 11.1 | 1.8 | 21 |

**Table S6.** Comparison of gelatin detritus (g) removed from target when stone-tipped and untipped thrusting spear replicates were extracted from ballistics gelatin.

|  | **Mean** | **95% CI** | **Min** | **Max** | **SD** | **N** | **N (non-zero values)** |
| --- | --- | --- | --- | --- | --- | --- | --- |
| Tipped | 0.3 | -0.034 to 0.607 | 0.0 | 2.7 | 0.7 | 22 | 6 |
| Untipped | 0.0 | -0.038 to 0.125 | 0.0 | 0.9 | 0.2 | 23 | 2 |

**Table S7.** Comparison of gelatin wound track cavity quarter (a) area and (b) perimeter between tipped and untipped thrusting spear replicates.

| **(a)** | **Inner Quarter Area (cm2)** | | | | | | **Outer Quarter Area (cm2)** | | | | | |
| --- | --- | --- | --- | --- | --- | --- | --- | --- | --- | --- | --- | --- |
|  | **Mean** | **95% CI** | **Min** | **Max** | **SD** | **N** | **Mean** | **95% CI** | **Min** | **Max** | **SD** | **N** |
| Tipped | 29.2 | 28.3 to 30.0 | 18.7 | 39.4 | 4.1 | 88 | 74.4 | 72.1 to 76.6 | 47.9 | 91.3 | 8.4 | 56 |
| Untipped | 23.4 | 22.2 to 24.6 | 13.7 | 34.0 | 4.9 | 67 | 80.4 | 73.4 to 87.4 | 47.7 | 128.5 | 18.0 | 28 |

| **(b)** | **Inner Quarter Perimeter (cm)** | | | | | | **Outer Quarter Perimeter (cm)** | | | | | |
| --- | --- | --- | --- | --- | --- | --- | --- | --- | --- | --- | --- | --- |
|  | **Mean** | **95% CI** | **Min** | **Max** | **SD** | **N** | **Mean** | **95% CI** | **Min** | **Max** | **SD** | **N** |
| Tipped | 42.2 | 41.6 to 42.8 | 35.1 | 47.3 | 2.9 | 88 | 45.6 | 45.0 to 46.3 | 38.0 | 50.2 | 2.5 | 56 |
| Untipped | 42.0 | 41.4 to 42.6 | 34.7 | 46.0 | 2.6 | 67 | 46.0 | 44.3 to 47.8 | 36.2 | 53.6 | 4.6 | 28 |


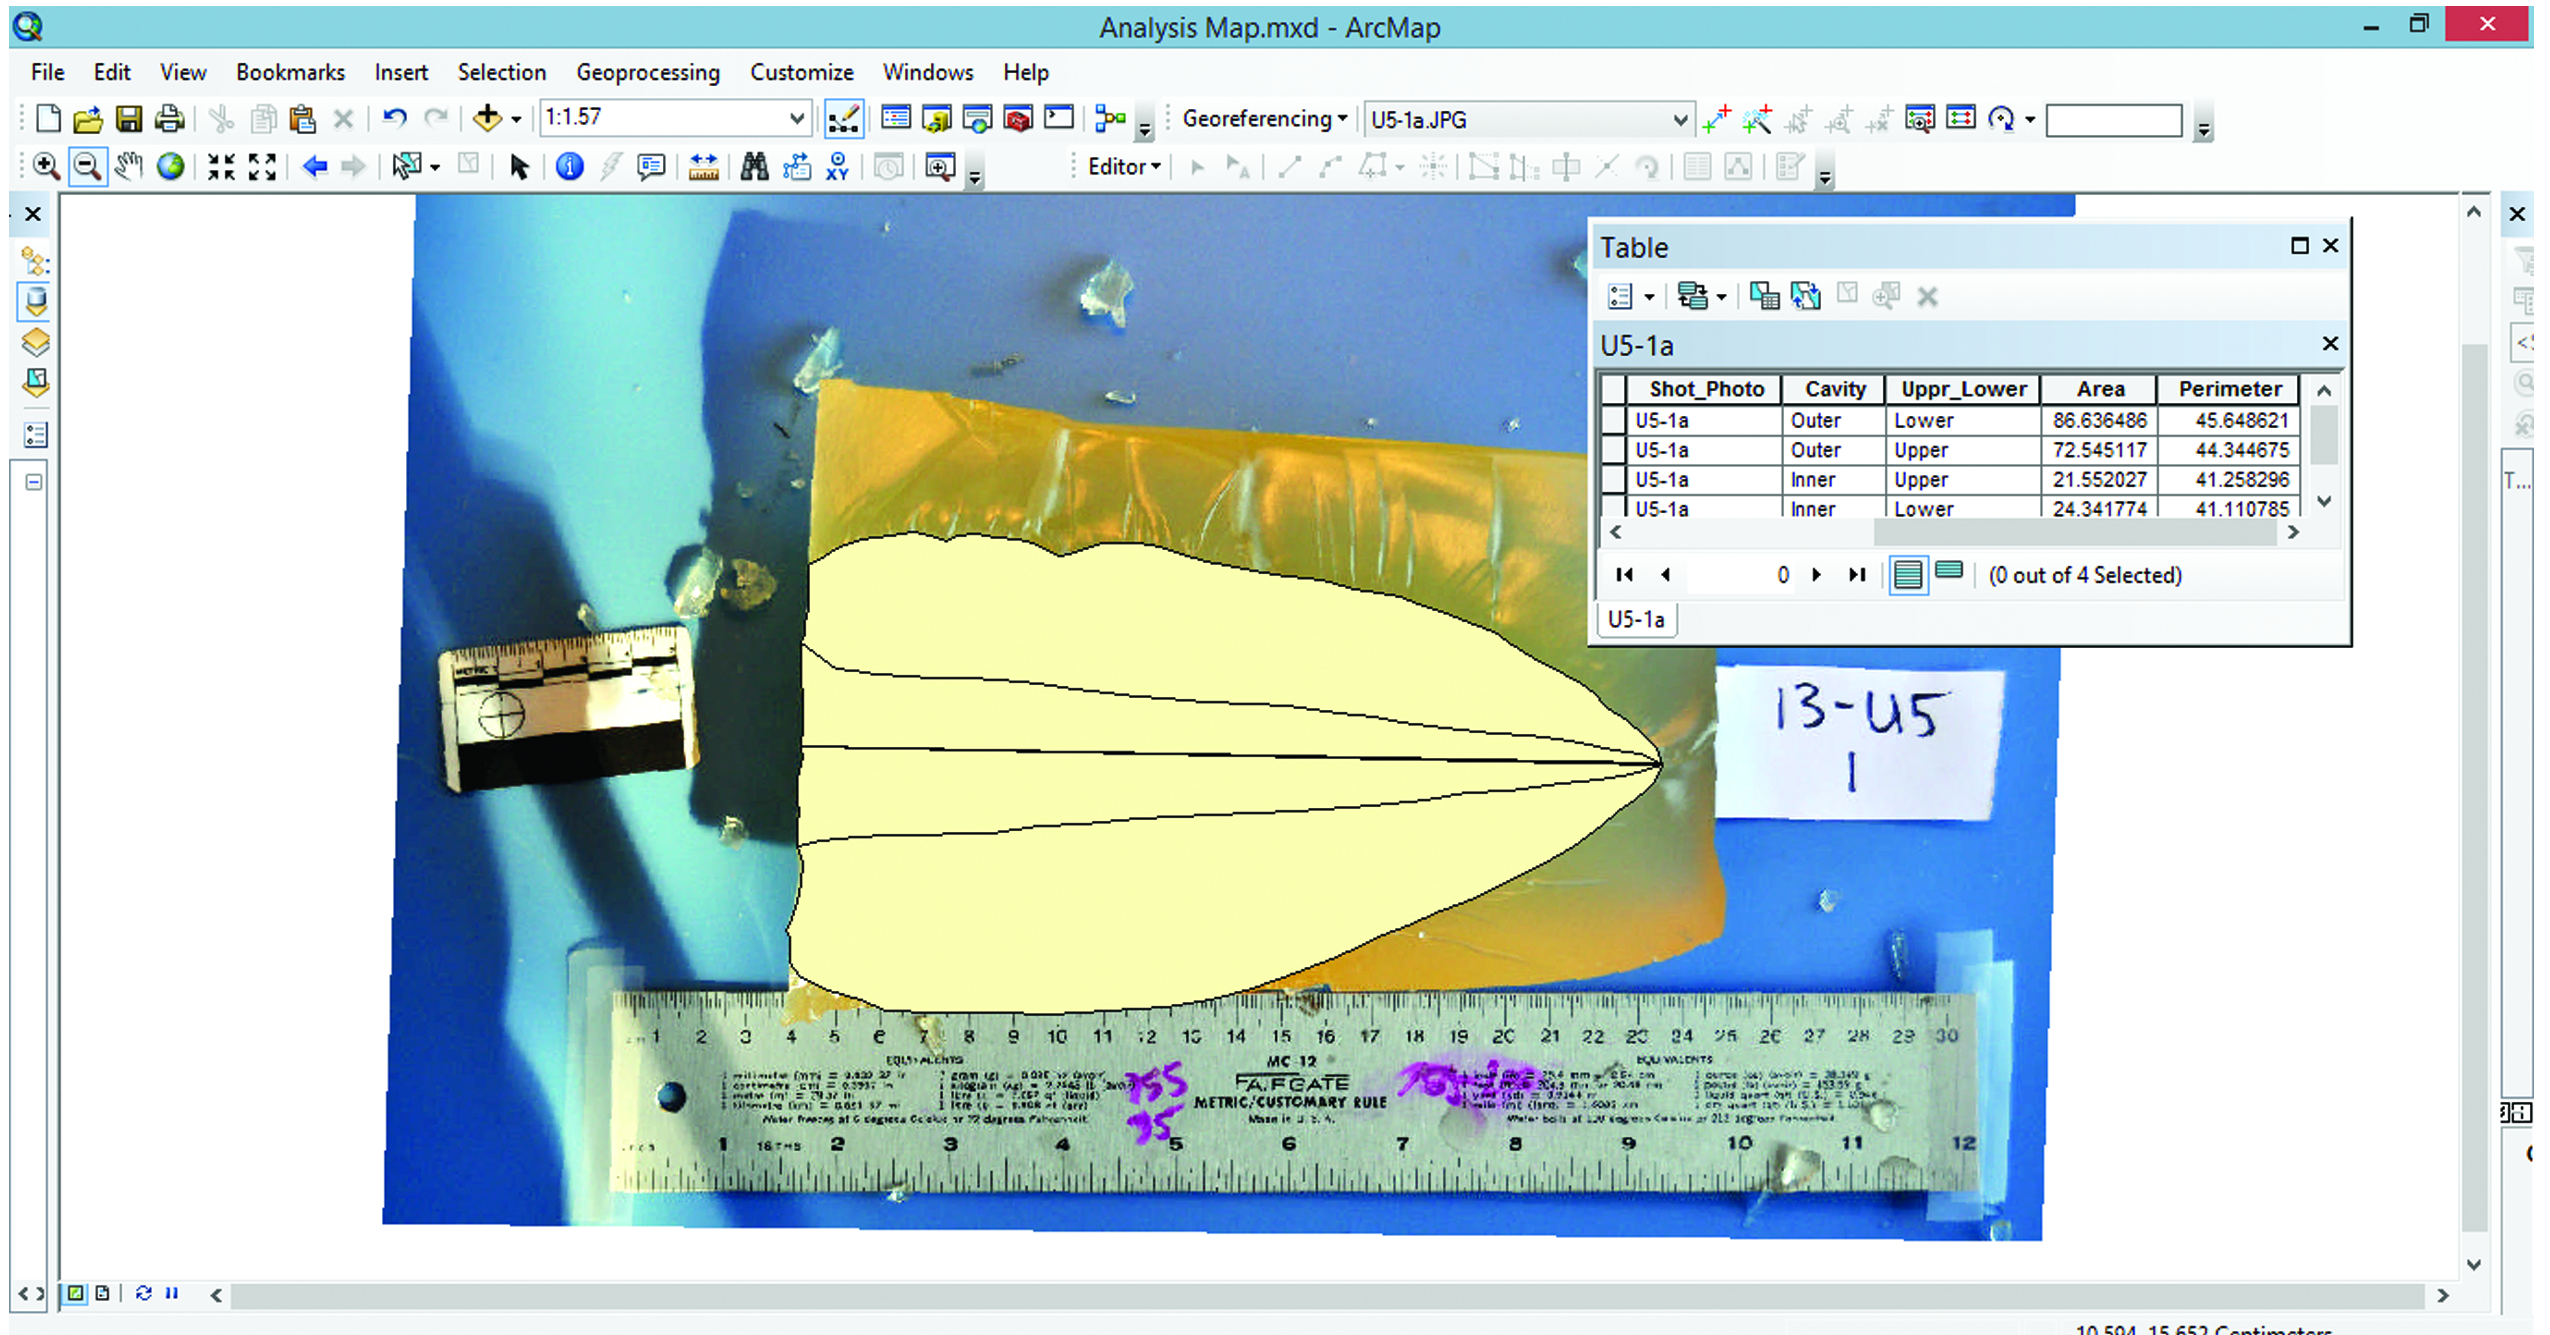


**Figure S1.** Screenshot of ArcGIS shapefiles used to calculate wound track area and perimeter.

**Appendix S1***Shot Data (including two exclusions due to equipment failure)*

| Shot No. | Spear Type | Spear No. | Spear Shot No. | Velocity (km/hr) | Velocity (m/s) | Penetration Depth (cm) | Withdraw Force (kg) | Mass of Detritus (g) | Comments |
| --- | --- | --- | --- | --- | --- | --- | --- | --- | --- |
| 1 | Tipped | T1 | 1 | 31 | 8.6 | 21.0 | nr* | 2.1 |  |
| 2 | Tipped | T1 | 2 | 36 | 10.0 | 20.5 | 6.5 | 0.0 |  |
| 3 | Tipped | T1 | 3 | 31 | 8.6 | 20.5 | 6.5 | 0.0 |  |
| 4 | Tipped | T1 | 4 | 33 | 9.2 | 19.0 | 8.5 | 0.1 |  |
| 5 | Tipped | T1 | 5 | 35 | 9.7 | 21.8 | 6.8 | 2.7 |  |
| 6 | Untipped | U1 | 1 | nr | - | 21.4 | 6.7 | 0.0 |  |
| 7 | Untipped | U1 | 2 | 35 | 9.7 | 22.2 | 6.9 | 0.9 |  |
| 8 | Untipped | U1 | 3 | nr | - | 25.5 | 5.1 | 0.0 |  |
| 9 | Untipped | U1 | 4 | nr | - | 22.1 | 6.1 | 0.0 |  |
| 10 | Untipped | U1 | 5 | 33 | 9.2 | nr | nr | 0.0 |  |
| 11 | Tipped | T2 | 1 | nr | - | 19.0 | 4.4 | 0.2 |  |
| 12 | Tipped | T2 | 2 | nr | - | 20.1 | 5.8 | 0.0 |  |
| 13 | Tipped | T2 | 3 | 36 | 10.0 | 20.1 | 4.5 | 0.0 |  |
| 14 | Tipped | T2 | 4 | nr | - | 19.5 | 6.1 | 0.0 |  |
| 15 | Tipped | T2 | 5 | 31 | 8.6 | 19.5 | 7.1 | 1.0 |  |
| 16 | Untipped | U2 | 1 | 30 | 8.3 | 20.0 | 6.4 | 0.1 |  |
| 17 | Untipped | U2 | 2 | 33 | 9.2 | 22.2 | 5.4 | 0.0 |  |
| 18 | Untipped | U2 | 3 | nr | - | 21.8 | 6.7 | 0.0 |  |
| 19 | Untipped | U2 | 4 | nr | - | 23.9 | 7.7 | 0.0 |  |
| 20 | Untipped | U2 | 5 | 33 | 9.2 | 24.1 | 5.4 | 0.0 |  |
| 21 | Tipped | T3 | 1 | 37 | 10.3 | 15.2 | 4.3 | 0.0 |  |
| 22 | Tipped | T3 | 2 | 37 | 10.3 | 22.8 | 7.1 | 0.0 |  |
| 23+ | Tipped | T3 | 3 | 37 | 10.3 | 20.2 | 5.8 | 0.3 | equipment failure, excluded |
| 24 | Tipped | T3 | 4 | na** | - | na | na | na | no shot because tip broke |
| 25 | Tipped | T3 | 5 | na | - | na | na | na | no shot because tip broke |
| 26 | Untipped | U3 | 1 | 28 | 7.8 | 19.6 | 4.5 | 0.0 |  |
| 27 | Untipped | U3 | 2 | 34 | 9.4 | 23.3 | 4.6 | 0.0 |  |
| 28 | Untipped | U3 | 3 | nr | - | 22.7 | 6.6 | 0.0 |  |
| 29 | Untipped | U3 | 4 | nr | - | 19.3 | 3.8 | 0.0 |  |
| 30 | Untipped | U3 | 5 | nr | - | 20.3 | 4.2 | 0.0 |  |
| 31 | Tipped | T4 | 1 | nr | - | 18.8 | 7.8 | 0.0 |  |
| 32 | Tipped | T4 | 2 | nr | - | 22.2 | 7.6 | 0.0 |  |
| 33 | Tipped | T4 | 3 | nr | - | 20.5 | 8.3 | 0.0 |  |
| 34 | Tipped | T4 | 4 | 30 | 8.3 | 21.3 | 5.7 | 0.0 |  |
| 35 | Tipped | T4 | 5 | 36 | 10.0 | 23.2 | 7.4 | 0.0 |  |
| 36 | Untipped | U4 | 1 | 31 | 8.6 | 22.1 | 7.3 | 0.0 |  |
| 37 | Untipped | U4 | 2 | nr | - | 24.1 | 6.7 | 0.0 |  |
| 38 | Untipped | U4 | 3 | nr | - | 23.8 | 6.8 | 0.0 |  |
| 39 | Untipped | U4 | 4 | 34 | 9.4 | 21.6 | nr | 0.0 |  |
| 40 | Untipped | U4 | 5 | nr | - | 24.8 | 6 | 0.0 |  |
| 41 | Tipped | T5 | 1 | 34 | 9.4 | 18.8 | 5.8 | 0.2 |  |
| 42 | Tipped | T5 | 2 | nr | - | 19.8 | 7.4 | 0.0 |  |
| 43 | Tipped | T5 | 3 | nr | - | 20.5 | 6.9 | 0.0 |  |
| 44 | Tipped | T5 | 4 | 33 | 9.2 | 19.5 | 5.9 | 0.0 |  |
| 45 | Tipped | T5 | 5 | nr | - | 17.0 | 6.4 | 0.0 |  |
| 46 | Untipped | U5 | 1 | nr | - | 19.7 | 11.1 | 0.0 |  |
| 47 | Untipped | U5 | 2 | nr | - | 19.4 | 10.5 | 0.0 |  |
| 48 | Untipped | U5 | 3 | 30 | 8.3 | 19.7 | 6.9 | 0.0 |  |
| 49+ | Untipped | U5 | 4 | 23 | 6.4 | 16.1 | 3.8 | 0.0 | equipment failure, excluded |
| 50 | Untipped | U5 | 5 | na | - | na | na | na | no shot because of equipment failure |

*nr=not recorded, **na=not applicable, +shot excluded from analyses

**Appendix S2**

Wound Track Data

| **Spear Type** | **Shot_Photo** | **Cavity** | **Upper_Lower** | **Area** | **Perimeter** |
| --- | --- | --- | --- | --- | --- |
| Tipped | T1-4b | Inner | Upper | 25.52 | 39.44 |
| Tipped | T1-4b | Inner | Lower | 29.41 | 39.95 |
| Tipped | T1-4b | Outer | Upper | 69.22 | 43.10 |
| Tipped | T1-4b | Outer | Lower | 70.35 | 44.36 |
| Tipped | T1-4a | Outer | Upper | 72.06 | 43.97 |
| Tipped | T1-4a | Outer | Lower | 72.03 | 44.24 |
| Tipped | T1-4a | Inner | Lower | 29.00 | 39.22 |
| Tipped | T1-4a | Inner | Upper | 29.80 | 39.85 |
| Tipped | T1-3b | Inner | Upper | 26.38 | 41.80 |
| Tipped | T1-3b | Inner | Lower | 31.30 | 42.40 |
| Tipped | T1-3b | Outer | Lower | 79.76 | 46.68 |
| Tipped | T1-3a | Inner | Upper | 30.93 | 42.32 |
| Tipped | T1-3a | Inner | Lower | 26.34 | 41.98 |
| Tipped | T1-3a | Outer | Upper | 77.32 | 46.39 |
| Tipped | T1-2b | Inner | Lower | 27.16 | 40.93 |
| Tipped | T1-2b | Inner | Upper | 25.54 | 40.33 |
| Tipped | T1-2b | Outer | Lower | 70.05 | 44.53 |
| Tipped | T1-2a | Outer | Upper | 62.53 | 42.47 |
| Tipped | T1-2a | Inner | Lower | 30.35 | 39.10 |
| Tipped | T1-2a | Inner | Upper | 29.18 | 39.12 |
| Tipped | T1-1b | Outer | Upper | 91.29 | 47.90 |
| Tipped | T1-1b | Inner | Upper | 25.38 | 42.27 |
| Tipped | T1-1b | Outer | Lower | 77.39 | 46.93 |
| Tipped | T1-1b | Inner | Lower | 34.07 | 42.50 |
| Tipped | T1-1a | Outer | Upper | 71.95 | 45.47 |
| Tipped | T1-1a | Inner | Upper | 33.68 | 42.54 |
| Tipped | T1-1a | Outer | Lower | 89.20 | 47.19 |
| Tipped | T1-1a | Inner | Lower | 28.41 | 42.59 |
| Tipped | T1-5a | Outer | Upper | 77.32 | 49.61 |
| Tipped | T1-5a | Inner | Upper | 30.90 | 45.05 |
| Tipped | T1-5a | Inner | Lower | 35.82 | 44.53 |
| Tipped | T1-5b | Inner | Upper | 31.72 | 46.25 |
| Tipped | T1-5b | Inner | Lower | 32.82 | 46.74 |
| Tipped | T1-5b | Outer | Lower | 84.18 | 50.19 |
| Tipped | T2-1a | Inner | Upper | 32.19 | 41.51 |
| Tipped | T2-1a | Inner | Lower | 26.60 | 41.82 |
| Tipped | T2-1a | Outer | Upper | 84.05 | 45.96 |
| Tipped | T2-1a | Outer | Lower | 68.13 | 46.43 |
| Tipped | T2-1b | Inner | Upper | 29.69 | 41.10 |
| Tipped | T2-1b | Inner | Lower | 27.15 | 41.10 |
| Tipped | T2-1b | Outer | Upper | 69.39 | 44.06 |
| Tipped | T2-1b | Outer | Lower | 71.77 | 44.49 |
| Tipped | T2-2a | Inner | Lower | 28.64 | 43.33 |
| Tipped | T2-2a | Outer | Lower | 69.30 | 47.12 |
| Tipped | T2-2a | Outer | Upper | 77.91 | 47.08 |
| Tipped | T2-2a | Inner | Upper | 29.05 | 43.35 |
| Tipped | T2-2b | Inner | Upper | 29.69 | 41.61 |
| Tipped | T2-2b | Inner | Lower | 26.18 | 41.51 |
| Tipped | T2-2b | Outer | Upper | 71.33 | 45.30 |
| Tipped | T2-2b | Outer | Lower | 71.04 | 44.67 |
| Tipped | T2-3a | Inner | Upper | 29.08 | 41.91 |
| Tipped | T2-3a | Inner | Lower | 30.13 | 42.12 |
| Tipped | T2-3b | Inner | Upper | 30.64 | 42.43 |
| Tipped | T2-3b | Inner | Lower | 26.52 | 42.55 |
| Tipped | T2-3b | Outer | Lower | 67.75 | 45.41 |
| Tipped | T2-4a | Inner | Upper | 28.97 | 40.82 |
| Tipped | T2-4a | Inner | Lower | 30.80 | 40.73 |
| Tipped | T2-4a | Outer | Upper | 67.65 | 44.27 |
| Tipped | T2-4b | Inner | Upper | 29.81 | 41.73 |
| Tipped | T2-4b | Inner | Lower | 26.31 | 42.36 |
| Tipped | T2-4b | Outer | Lower | 72.48 | 46.26 |
| Tipped | T2-5a | Inner | Upper | 31.27 | 41.95 |
| Tipped | T2-5a | Inner | Lower | 35.44 | 41.75 |
| Tipped | T2-5a | Outer | Upper | 63.26 | 44.11 |
| Tipped | T2-5a | Outer | Lower | 84.98 | 46.43 |
| Tipped | T2-5b | Inner | Upper | 27.46 | 41.05 |
| Tipped | T2-5b | Inner | Lower | 28.41 | 41.41 |
| Tipped | T2-5b | Outer | Upper | 70.98 | 44.80 |
| Tipped | T2-5b | Outer | Lower | 62.55 | 43.81 |
| Tipped | T3-1a | Inner | Lower | 28.95 | 35.91 |
| Tipped | T3-1a | Inner | Upper | 19.26 | 35.52 |
| Tipped | T3-1a | Outer | Upper | 47.95 | 38.00 |
| Tipped | T3-1b | Inner | Upper | 28.35 | 38.47 |
| Tipped | T3-1b | Inner | Lower | 26.73 | 39.03 |
| Tipped | T3-1b | Outer | Lower | 53.49 | 40.84 |
| Tipped | T3-3a | Inner | Upper | 29.88 | 44.82 |
| Tipped | T2-3a | Inner | Lower | 35.51 | 44.66 |
| Tipped | T3-3b | Inner | Upper | 33.13 | 44.52 |
| Tipped | T3-3b | Inner | Lower | 33.55 | 44.71 |
| Tipped | T4-1a | Inner | Upper | 25.84 | 40.40 |
| Tipped | T4-1a | Inner | Lower | 31.59 | 41.10 |
| Tipped | T4-1a | Outer | Lower | 78.09 | 45.33 |
| Tipped | T4-1b | Inner | Upper | 33.24 | 40.14 |
| Tipped | T4-1b | Inner | Lower | 23.27 | 39.61 |
| Tipped | T4-1b | Outer | Upper | 74.96 | 43.63 |
| Tipped | T4-2a | Inner | Upper | 28.46 | 46.11 |
| Tipped | T4-2a | Inner | Upper | 36.06 | 45.23 |
| Tipped | T4-2b | Inner | Upper | 39.42 | 46.81 |
| Tipped | T4-2b | Inner | Lower | 30.27 | 47.30 |
| Tipped | T4-3a | Inner | Upper | 31.79 | 45.93 |
| Tipped | T4-3a | Inner | Lower | 34.34 | 45.88 |
| Tipped | T4-3a | Outer | Lower | 86.43 | 49.52 |
| Tipped | t4-3a | Outer | Upper | 65.81 | 48.41 |
| Tipped | T4-3b | Inner | Upper | 31.06 | 45.14 |
| Tipped | T4-3b | Inner | Lower | 34.82 | 45.73 |
| Tipped | T4-3b | Outer | Upper | 81.05 | 48.31 |
| Tipped | T4-3b | Outer | Lower | 73.21 | 48.99 |
| Tipped | T4-4a | Outer | Upper | 69.97 | 48.36 |
| Tipped | T4-4a | Outer | Lower | 80.60 | 49.70 |
| Tipped | T4-4a | Inner | Upper | 31.93 | 46.68 |
| Tipped | T4-4a | Inner | Lower | 28.40 | 45.52 |
| Tipped | T4-4b | Outer | Upper | 85.94 | 50.15 |
| Tipped | T4-4b | Outer | Lower | 70.41 | 49.47 |
| Tipped | T4-4b | Inner | Upper | 30.79 | 46.47 |
| Tipped | T4-4b | Inner | Lower | 34.15 | 46.88 |
| Tipped | T4-5a | Inner | Upper | 27.98 | 45.53 |
| Tipped | T4-5a | Inner | Lower | 34.40 | 45.30 |
| Tipped | T4-5b | Inner | Upper | 36.62 | 46.72 |
| Tipped | T4-5b | Inner | Lower | 35.75 | 46.68 |
| Tipped | T5-1a | Inner | Upper | 30.12 | 40.12 |
| Tipped | T5-1a | Inner | Lower | 19.62 | 39.41 |
| Tipped | T5-1a | Outer | Lower | 69.43 | 45.59 |
| Tipped | T5-1b | Inner | Upper | 22.91 | 42.80 |
| Tipped | T5-1b | Inner | Lower | 26.38 | 42.79 |
| Tipped | T5-1b | Outer | Upper | 75.49 | 46.67 |
| Tipped | T5-2a | Inner | Upper | 29.90 | 40.28 |
| Tipped | T5-2a | Inner | Lower | 24.65 | 40.05 |
| Tipped | T5-2a | Outer | Upper | 67.23 | 43.58 |
| Tipped | T5-2a | Outer | Lower | 79.16 | 46.21 |
| Tipped | T5-2b | Inner | Upper | 23.19 | 40.41 |
| Tipped | T5-2b | Inner | Lower | 29.89 | 40.77 |
| Tipped | T5-2b | Outer | Upper | 69.89 | 43.41 |
| Tipped | T5-2b | Outer | Lower | 70.43 | 44.48 |
| Tipped | T5-3a | Inner | Upper | 32.15 | 44.77 |
| Tipped | T5-3a | Inner | Lower | 26.68 | 44.62 |
| Tipped | T5-3a | Outer | Lower | 74.39 | 48.29 |
| Tipped | T5-3b | Inner | Upper | 28.97 | 45.19 |
| Tipped | T5-3b | Inner | Lower | 30.55 | 45.30 |
| Tipped | T5-3b | Outer | Upper | 76.91 | 48.64 |
| Tipped | T5-4a | Inner | Upper | 24.48 | 39.87 |
| Tipped | T5-4a | Inner | Lower | 23.16 | 40.14 |
| Tipped | T5-4a | Outer | Upper | 84.90 | 45.25 |
| Tipped | T5-4a | Outer | Lower | 88.10 | 45.33 |
| Tipped | T5-4b | Inner | Upper | 23.19 | 39.93 |
| Tipped | T5-4b | Inner | Upper | 26.57 | 40.40 |
| Tipped | T5-4b | Outer | Lower | 85.95 | 45.55 |
| Tipped | T5-5a | Inner | Upper | 21.47 | 35.09 |
| Tipped | T5-5a | Inner | Lower | 23.82 | 35.80 |
| Tipped | T5-5a | Outer | Upper | 82.50 | 41.28 |
| Tipped | T5-5a | Outer | Lower | 79.08 | 43.27 |
| Tipped | T5-5b | Inner | Upper | 26.07 | 36.44 |
| Tipped | T5-5b | Inner | Lower | 18.72 | 36.01 |
| Tipped | T5-5b | Outer | Upper | 77.35 | 42.68 |
| Tipped | T5-5b | Outer | Lower | 78.62 | 41.61 |
| Untipped | U1-1a | Inner | Upper | 20.14 | 41.31 |
| Untipped | U1-1a | Inner | Lower | 28.42 | 41.78 |
| Untipped | U1-1b | Inner | Lower | 22.12 | 40.95 |
| Untipped | U1-1b | Inner | Upper | 28.97 | 41.34 |
| Untipped | U1-2a | Inner | Upper | 19.01 | 45.70 |
| Untipped | U1-2a | Inner | Lower | 22.33 | 45.86 |
| Untipped | U1-21 | Outer | Upper | 89.90 | 53.14 |
| Untipped | U1-2b | Inner | Upper | 16.49 | 45.59 |
| Untipped | U1-2b | Inner | Lower | 26.74 | 45.99 |
| Untipped | U1-2b | Outer | Lower | 100.64 | 53.55 |
| Untipped | U1-4a | Inner | Lower | 22.24 | 43.66 |
| Untipped | U1-4a | Inner | Upper | 28.32 | 44.02 |
| Untipped | U1-4a | Outer | Lower | 78.71 | 47.90 |
| Untipped | U1-4a | Outer | Upper | 91.74 | 49.78 |
| Untipped | U1-4a | Inner | Upper | 26.01 | 44.68 |
| Untipped | U1-4a | Inner | Lower | 26.83 | 45.36 |
| Untipped | U1-5a | Inner | Lower | 20.84 | 44.20 |
| Untipped | U1-5a | Inner | Upper | 28.34 | 44.29 |
| Untipped | U1-5b | Inner | Lower | 22.18 | 43.76 |
| Untipped | U1-5b | Inner | Upper | 22.31 | 43.61 |
| Untipped | U2-1a | Outer | Upper | 75.86 | 46.31 |
| Untipped | U2-1a | Inner | Lower | 28.27 | 43.11 |
| Untipped | U2-1a | Inner | Upper | 21.36 | 42.66 |
| Untipped | U2-1a | Outer | Lower | 73.44 | 46.38 |
| Untipped | U2-1b | Outer | Upper | 65.99 | 44.81 |
| Untipped | U2-1b | Outer | Lower | 67.82 | 45.07 |
| Untipped | U2-1b | Inner | Lower | 17.62 | 41.35 |
| Untipped | U2-1b | Inner | Upper | 25.77 | 41.51 |
| Untipped | U2-2a | Inner | Lower | 27.68 | 43.50 |
| Untipped | U2-2a | Inner | Upper | 25.24 | 43.32 |
| Untipped | U2-2b | Inner | Upper | 30.83 | 43.48 |
| Untipped | U2-2b | Inner | Upper | 28.35 | 43.69 |
| Untipped | U2-3a | Inner | Upper | 23.37 | 41.87 |
| Untipped | U2-3a | Inner | Lower | 34.00 | 42.13 |
| Untipped | U2-3a | Outer | Upper | 77.44 | 47.33 |
| Untipped | U2-3b | Inner | Upper | 28.04 | 40.87 |
| Untipped | U2-3b | Inner | Lower | 17.18 | 40.76 |
| Untipped | U2-3b | Outer | Lower | 77.38 | 47.20 |
| Untipped | U2-4a | Inner | Lower | 32.28 | 43.95 |
| Untipped | U2-4a | Inner | Upper | 26.57 | 43.71 |
| Untipped | U2-4b | Inner | Upper | 29.39 | 42.60 |
| Untipped | U2-4b | Inner | Lower | 28.53 | 42.69 |
| Untipped | U3-1c | Inner | Upper | 18.75 | 39.56 |
| Untipped | U3-1c | Inner | Lower | 13.68 | 39.64 |
| Untipped | U3-1c | Outer | Upper | 47.70 | 42.81 |
| Untipped | U3-1c | Outer | Lower | 73.58 | 48.77 |
| Untipped | U3-3d | Inner | Upper | 19.89 | 40.33 |
| Untipped | U3-3d | Inner | Lower | 16.25 | 40.23 |
| Untipped | U3-4a | Inner | Lower | 14.30 | 40.36 |
| Untipped | U3-4a | Outer | Lower | 112.56 | 50.63 |
| Untipped | U3-4b | Outer | Upper | 128.50 | 52.10 |
| Untipped | U3-4b | Inner | Lower | 19.73 | 39.65 |
| Untipped | U3-4b | Inner | Upper | 17.07 | 39.76 |
| Untipped | U3-5c | Inner | Upper | 19.11 | 42.13 |
| Untipped | U3-5c | Inner | Lower | 23.45 | 42.73 |
| Untipped | U3-5c | Outer | Upper | 114.20 | 50.97 |
| Untipped | U3-5c | Outer | Lower | 90.98 | 47.37 |
| Untipped | U4-1a | Inner | Upper | 28.18 | 45.83 |
| Untipped | U4-1a | Inner | Lower | 27.77 | 45.84 |
| Untipped | U4-1b | Inner | Upper | 26.43 | 45.23 |
| Untipped | U4-1b | Inner | Lower | 27.06 | 44.89 |
| Untipped | U4-3b | Inner | Upper | 28.96 | 43.94 |
| Untipped | U4-3b | Inner | Lower | 24.88 | 43.91 |
| Untipped | U4-5a | Inner | Upper | 22.17 | 43.31 |
| Untipped | U4-5a | Inner | Lower | 30.88 | 43.99 |
| Untipped | U4-5b | Inner | Upper | 30.52 | 43.33 |
| Untipped | U4-5b | Inner | Lower | 25.97 | 43.28 |
| Untipped | U5-1a | Inner | Upper | 21.55 | 41.26 |
| Untipped | U5-1a | Inner | Lower | 24.34 | 41.11 |
| Untipped | U5-1a | Outer | Lower | 86.64 | 45.65 |
| Untipped | U5-1a | Outer | Upper | 72.55 | 44.34 |
| Untipped | U5-1b | Inner | Upper | 22.68 | 40.70 |
| Untipped | U5-1b | Inner | Lower | 25.36 | 41.05 |
| Untipped | U5-1b | Outer | Upper | 85.93 | 45.78 |
| Untipped | U5-1b | Outer | Lower | 78.44 | 44.95 |
| Untipped | U5-2a | Inner | Upper | 17.43 | 39.41 |
| Untipped | U5-2a | Inner | Lower | 24.26 | 40.34 |
| Untipped | U5-2a | Outer | Upper | 69.93 | 43.30 |
| Untipped | U5-2b | Inner | Upper | 22.86 | 40.06 |
| Untipped | U5-2b | Inner | Lower | 20.38 | 39.60 |
| Untipped | U5-2b | Outer | Lower | 71.81 | 44.03 |
| Untipped | U5-3a | Inner | Upper | 19.57 | 38.41 |
| Untipped | U5-3a | Inner | Lower | 21.44 | 38.69 |
| Untipped | U5-3a | Outer | Upper | 85.85 | 48.55 |
| Untipped | U5-3b | Inner | Upper | 21.79 | 39.03 |
| Untipped | U5-3b | Inner | Upper | 21.01 | 39.48 |
| Untipped | U5-3b | Outer | Lower | 87.75 | 48.90 |
| Untipped | U5-4a | Inner | Upper | 16.06 | 36.53 |
| Untipped | U5-4a | Inner | Lower | 19.43 | 36.97 |
| Untipped | U5-4a | Outer | Upper | 66.96 | 38.05 |
| Untipped | U5-4a | Outer | Lower | 61.93 | 38.31 |
| Untipped | U5-4b | Inner | Upper | 14.54 | 35.01 |
| Untipped | U5-4b | Inner | Lower | 15.11 | 34.73 |
| Untipped | U5-4b | Outer | Upper | 55.00 | 36.25 |
| Untipped | U5-4b | Outer | Lower | 61.81 | 36.76 |
